# Supplementary material for: Unleashing a novel function of Endonuclease G in mitochondrial genome instability
Source: eLife journal article supplement (doi:10.7554/elife.69916), 2022-11-17
Supplement: fig1-data1 [file Figure 1D_Quantitation_Circular dichroism_C and G strand in absence and presence of KCl.xlsx]

## Sheet: Sheet1
				Quantitation of Circular Dichroism of C and G strand in absence and presence of KCl
			C strand	G strand			G strand	KCl-	KCl+
		300	0.060739	0			300	0	0
		299	0.079972	0.023306			299	0.007644	0.023306
		298	0.133838	0.086659			298	0.029029	0.086659
		297	0.211997	0.172332			297	0.05983	0.172332
		296	0.300696	0.256708			296	0.093811	0.256708
		295	0.386805	0.317257			295	0.124106	0.317257
		294	0.461508	0.339069			294	0.144651	0.339069
		293	0.522459	0.318982			293	0.151461	0.318982
		292	0.57381	0.266148			292	0.143481	0.266148
		291	0.624099	0.198937			291	0.122763	0.198937
		290	0.682851	0.139294			290	0.093928	0.139294
		289	0.756994	0.106314			289	0.063017	0.106314
		288	0.848361	0.111029			288	0.0360183	0.111029
		287	0.953054	0.153888			287	0.0174821	0.153888
		286	1.06286	0.225527			286	0.0096126	0.225527
		285	1.16813	0.310375			285	0.0120924	0.310375
		284	1.26114	0.391785			284	0.0226788	0.391785
		283	1.33856	0.456983			283	0.0383324	0.456983
		282	1.40236	0.500376			282	0.0564888	0.500376
		281	1.45847	0.524297			281	0.0759822	0.524297
		280	1.51411	0.537255			280	0.0972946	0.537255
		279	1.57431	0.550452			279	0.122022	0.550452
		278	1.63914	0.573912			278	0.151777	0.573912
		277	1.70273	0.613463			277	0.18696	0.613463
		276	1.75443	0.669478			276	0.225953	0.669478
		275	1.78189	0.737575			275	0.265119	0.737575
		274	1.77499	0.810799			274	0.299735	0.810799
		273	1.72941	0.882262			273	0.325591	0.882262
		272	1.64844	0.947384			272	0.340709	0.947384
		271	1.54234	1.00482			271	0.346501	1.00482
		270	1.42536	1.05594			270	0.347831	1.05594
		269	1.31134	1.10322			269	0.351828	1.10322
		268	1.20932	1.14824			268	0.365674	1.14824
		267	1.12057	1.19018			267	0.394095	1.19018
		266	1.0383	1.22533			266	0.43737	1.22533
		265	0.95005	1.24782			265	0.49059	1.24782
		264	0.842175	1.25142			264	0.54455	1.25142
		263	0.704895	1.23142			263	0.588025	1.23142
		262	0.536334	1.18613			262	0.610802	1.18613
		261	0.344096	1.11741			261	0.606424	1.11741
		260	0.143827	1.02992			260	0.573861	1.02992
		259	-0.0448582	0.929521			259	0.517377	0.929521
		258	-0.203794	0.821465			258	0.444847	0.821465
		257	-0.321293	0.708916			257	0.364988	0.708916
		256	-0.395163	0.592391			256	0.284535	0.592391
		255	-0.432761	0.470388			255	0.206361	0.470388
		254	-0.448108	0.340676			254	0.129162	0.340676
		253	-0.457067	0.202059			253	0.048795	0.202059
		252	-0.472231	0.0556049			252	-0.0392851	0.0556049
		251	-0.499236	-0.094897			251	-0.137432	-0.094897
		250	-0.5357	-0.243524			250	-0.244087	-0.243524
		249	-0.573079	-0.383617			249	-0.353597	-0.383617
		248	-0.600689	-0.509439			248	-0.457695	-0.509439
		247	-0.610412	-0.6175			247	-0.548086	-0.6175
		246	-0.600362	-0.707067			246	-0.619178	-0.707067
		245	-0.576143	-0.779672			245	-0.669873	-0.779672
		244	-0.549221	-0.837859			244	-0.703692	-0.837859
		243	-0.532935	-0.883643			243	-0.727117	-0.883643
		242	-0.537561	-0.917315			242	-0.746718	-0.917315
		241	-0.566188	-0.937056			241	-0.766128	-0.937056
		240	-0.612924	-0.939551			240	-0.78404	-0.939551
		239	-0.66418	-0.921407			239	-0.794106	-0.921407
		238	-0.702715	-0.880832			238	-0.786791	-0.880832
		237	-0.713058	-0.818925			237	-0.752834	-0.818925
		236	-0.68661	-0.740127			236	-0.686836	-0.740127
		235	-0.62457	-0.651437			235	-0.589856	-0.651437
		234	-0.53768	-0.560677			234	-0.469996	-0.560677
		233	-0.44286	-0.474307			233	-0.340466	-0.474307
		232	-0.35774	-0.395527			232	-0.215886	-0.395527
		231	-0.29495	-0.323207			231	-0.107896	-0.323207
		230	-0.25808	-0.252217			230	-0.021686	-0.252217
		229	-0.24069	-0.175107			229	0.045364	-0.175107
		228	-0.22861	-0.084447			228	0.102394	-0.084447
		227	-0.20496	0.024543			227	0.161574	0.024543
		226	-0.15606	0.152153			226	0.233484	0.152153
		225	-0.07641	0.293583			225	0.323134	0.293583
		224	0.02901	0.439793			224	0.427924	0.439793
		223	0.1458	0.579763			223	0.538454	0.579763
		222	0.25418	0.703143			222	0.641794	0.703143
		221	0.3347	0.803023			221	0.726164	0.803023
		220	0.37372	0.877463			220	0.785334	0.877463
							219	0.821084	0.929933
							218	0.842694	0.968093
							217	0.863584	1.00154
							216	0.895954	1.03919
							215	0.945524	1.08686
							214	1.00805	1.14598
							213	1.06907	1.21347
							212	1.10724	1.28293
							211	1.10053	1.34674
							210	1.03325	1.3983
							209	0.901964	1.43388
							208	0.718104	1.45363
							207	0.506644	1.46142
							206	0.300714	1.46371
							205	0.133774	1.46772
							204	0.031604	1.4796
							203	0.00621	1.50293
							202	0.053324	1.53798
							201	0.154338	1.58192
							200	0.281615	1.6297
