# Supplementary material for: Unleashing a novel function of Endonuclease G in mitochondrial genome instability
Source: eLife journal article supplement (doi:10.7554/elife.69916), 2022-11-17
Supplement: fig2-data1 [file Figure 2F_Quantitation_ions_primer extension.xlsx]

## Sheet: Sheet1
				Quantitation of primer extension using different ions
				Ions	No Ion	K	Li	Na
					10000	25000	11000	10500
