# Supplementary material for: Unleashing a novel function of Endonuclease G in mitochondrial genome instability
Source: eLife journal article supplement (doi:10.7554/elife.69916), 2022-11-17
Supplement: fig4-data1 [file elife-69916-fig4-data1-v3.zip]

## Sheet: Sheet1
				Quantitation of localization of BG4 to mitochondria_Mander coefficient
				Control	HeLa	293T
				0.017	0.25	0.37
				0.014	0.26	0.32
				0.015	0.22	0.358
				0.014	0.28	0.42
				0.017	0.33	0.381
				0.011	0.29	0.33
				0.012	0.26	0.346
				0.006	0.32	0.321
				0.009	0.36	0.41
				0.013	0.27	0.461
				0.011	0.23	0.44
				0.012	0.22	0.43
				0.012	0.26	0.35
				0.017	0.31	0.38
				0.014	0.21	0.35
				0.015	0.22	0.32
				0.014	0.23	0.45
				0.017	0.23	0.42
				0.012	0.26	0.44
				0.017	0.29	0.43
				0.014	0.37	0.44
				0.015	0.32	0.43
				0.014	0.11	0.38
				0.017	0.27	0.42
				0.011	0.25	0.46
				0.01	0.29	0.456
				0.011	0.32	0.431
				0.01	0.35	0.5
				0.015	0.29	0.318
				0.011	0.275	0.321
				0.013	0.261	0.338
				0.021	0.24	0.298
				0.009	0.24	0.342
				0.012	0.234	0.332
				0.017	0.29	0.32
				0.02	0.22	0.34
				0.015	0.21	0.32
				0.012	0.32	0.35
				0.012	0.32	0.37
				0.017	0.33	0.48
				0.014	0.28	0.45
				0.015	0.25	0.452
				0.014	0.22	0.44
				0.017	0.24	0.423
				0.011	0.32	0.45
				0.012	0.35	0.45
				0.006	0.21	0.42
				0.009	0.27	0.39
				0.013	0.22	0.34
				0.011	0.28	0.32
				0.019	0.26	0.43
				0.003	0.26	0.42
				0.011	0.17	0.11
				0.022	0.28	0.27
				0.012	0.28	0.25
				0.017	0.31	0.29
				0.016	0.33	0.32
				0.015	0.313	0.35
				0.024	0.33	0.29
				0.017	0.292	0.456
				0.019	0.31	0.431
				0.016	0.34	0.5
				0.013	0.33	0.318
				0.018	0.32	0.321
				0.015	0.28	0.338
				0.016	0.21	0.298
				0.019	0.222	0.342
				0.021	0.265	0.332
				0.013	0.31	0.32
				0.016	0.21	0.34
				0.013	0.21	0.32
				0.016	0.23	0.35
				0.015	0.31	0.37
				0.011	0.22	0.48
				0.009	0.36	0.31
				0.012	0.31	0.33
				0.017	0.24	0.313
				0.02	0.32	0.28
				0.015	0.31	0.33
				0.012	0.25	0.29
				0.022	0.25	0.26
				0.019	0.23	0.32
				0.015	0.23	0.36
				0.016	0.23	0.27
				0.014	0.31	0.23
				0.017	0.38	0.22
				0.011	0.215	0.37
				0.012	0.192	0.32
				0.006	0.23	0.358
				0.009	0.44	0.42
				0.013	0.43	0.381
				0.011	0.35	0.33
				0.018	0.38	0.346
				0.011	0.35	0.321
				0.01	0.32	0.41
				0.002	0.45	0.461
				0.017	0.42	0.42
				0.07	0.44	0.44
				0.015	0.43	0.42
				0.022	0.44	0.45
					0.43	0.47
					0.38	0.48
					0.42	0.21
						0.33
