# Supplementary material for: Unleashing a novel function of Endonuclease G in mitochondrial genome instability
Source: eLife journal article supplement (doi:10.7554/elife.69916), 2022-11-17
Supplement: fig4-data1 [file Figure 4C_Quantitation of colocalization of BG4 to mitochondria_Mander Coefficient.xlsx]

## Sheet: Sheet1
					Quantitation of colocalization of BG4 to mitochondria_Mander coefficient
					Control	HeLa	293T
					0.01	0.32	0.44
					0.011	0.31	0.43
					0.017	0.25	0.44
					0.014	0.25	0.43
					0.015	0.23	0.38
					0.014	0.23	0.42
					0.017	0.23	0.46
					0.011	0.31	0.456
					0.012	0.38	0.431
					0.017	0.215	0.5
					0.02	0.192	0.318
					0.015	0.23	0.321
					0.012	0.33	0.338
					0.012	0.313	0.498
					0.017	0.33	0.48
					0.014	0.292	0.45
					0.015	0.31	0.452
					0.014	0.34	0.44
					0.017	0.33	0.37
					0.011	0.32	0.32
					0.012	0.28	0.358
					0.006	0.21	0.42
					0.009	0.222	0.381
					0.013	0.265	0.33
					0.011	0.31	0.346
					0.012	0.21	0.321
					0.012	0.21	0.41
					0.017	0.23	0.461
					0.014	0.31	0.44
					0.015	0.22	0.43
					0.014	0.36	0.35
					0.017	0.31	0.38
					0.013	0.24	0.35
					0.011	0.234	0.32
					0.012	0.29	0.45
					0.012	0.22	0.42
					0.017	0.21	0.423
					0.02	0.32	0.45
					0.015	0.32	0.45
					0.012	0.33	0.42
					0.012	0.28	0.45
					0.017	0.25	0.452
					0.014	0.22	0.44
					0.015	0.26	0.423
					0.014	0.31	0.45
					0.017	0.21	0.45
					0.011	0.22	0.42
					0.012	0.23	0.39
					0.014	0.23	0.34
					0.015	0.26	0.32
					0.014	0.29	0.43
					0.017	0.37	0.42
					0.011	0.32	0.44
					0.012	0.31	0.43
					0.017	0.27	0.35
					0.015	0.25	0.38
					0.014	0.33	0.35
					0.017	0.313	0.32
					0.013	0.33	0.45
					0.011	0.292	0.42
					0.012	0.31	0.44
					0.012	0.34	0.43
					0.017	0.33	0.44
					0.02	0.32	0.43
					0.015	0.28	0.38
					0.012	0.21	0.42
					0.012	0.222	0.46
					0.017	0.265	0.45
					0.014	0.31	0.45
					0.011	0.21	0.42
					0.017	0.21	0.45
					0.014	0.23	0.318
					0.015	0.31	0.321
					0.014	0.22	0.338
					0.017	0.36	0.498
					0.011	0.31	0.48
					0.012	0.24	0.45
					0.017	0.32	0.452
					0.02	0.31	0.44
					0.015	0.25	0.37
					0.012	0.25	0.32
					0.012	0.23	0.358
					0.017	0.23	0.42
					0.014	0.23	0.43
					0.015	0.31	0.38
					0.011	0.38	0.42
					0.012	0.215	0.46
					0.006	0.192	0.456
					0.009	0.23	0.431
					0.013	0.31	0.5
					0.011	0.21	0.37
					0.012	0.21	0.32
					0.012	0.23	0.358
					0.017	0.31	0.42
					0.014	0.22	0.381
					0.015	0.36	0.33
					0.014	0.31	0.346
					0.014	0.24	0.321
					0.015	0.31	0.41
					0.011		0.461
					0.012		0.44
							0.43
							0.35
