# Supplementary material for: Unleashing a novel function of Endonuclease G in mitochondrial genome instability
Source: eLife journal article supplement (doi:10.7554/elife.69916), 2022-11-17
Supplement: fig4-data1 [file Figure 4E_Quantitation of colocalization in Hela vs rho cells.xlsx]

## Sheet: Sheet1
	Quantitation of colocalization in Hela vs rho cells
	HeLa	rho
	0.25	0.15
	0.26	0.16
	0.22	0.12
	0.28	0.18
	0.33	0.13
	0.29	0.19
	0.26	0.16
	0.32	0.12
	0.36	0.16
	0.27	0.2
	0.23	0.23
	0.22	0.22
	0.26	0.2
	0.31	0.1
	0.21	0.21
	0.22	0.22
	0.23	0.13
	0.23	0.13
	0.26	0.16
	0.29	0.19
	0.37	0.17
	0.32	0.12
	0.11	0.11
	0.27	0.07
	0.25	0.05
	0.29	0.09
	0.32	0.02
	0.35	0.1
	0.29	0.2
	0.275	0.21
	0.261	0.21
	0.24	0.21
	0.24	0.21
	0.234	0.134
	0.29	0.19
	0.22	0.12
	0.21	0.11
	0.32	0.12
	0.32	0.12
	0.33	0.13
	0.28	0.18
	0.25	0.15
	0.22	0.22
	0.24	0.14
	0.32	0.12
	0.35	0.15
	0.21	0.21
	0.27	0.17
	0.22	0.12
	0.28	0.18
	0.26	0.16
	0.26	0.16
	0.17	0.17
	0.28	0.18
	0.28	0.18
	0.31	0.11
	0.33	0.13
	0.313	0.13
	0.33	0.13
	0.292	0.202
	0.31	0.11
	0.34	0.14
	0.33	0.13
	0.32	0.12
	0.28	0.18
	0.21	0.21
	0.222	0.202
	0.265	0.205
	0.31	0.11
	0.21	0.21
	0.21	0.21
	0.23	0.23
	0.31	0.11
	0.22	0.12
	0.36	0.16
	0.31	0.11
	0.24	0.14
	0.32	0.12
	0.31	0.11
	0.25	0.15
	0.25	0.15
	0.23	0.13
	0.23	0.13
	0.23	0.13
	0.31	0.11
	0.38	0.18
	0.215	0.215
	0.192	0.192
	0.23	0.13
	0.22	0.22
	0.21	0.21
	0.32	0.12
	0.32	0.12
	0.33	0.13
	0.28	0.18
	0.25	0.15
	0.22	0.12
	0.24	0.14
	0.32	0.12
	0.35	0.15
	0.21	0.21
	0.27	0.17
	0.22	0.22
	0.28	0.18
	0.26	0.16
	0.26	0.16
