# Supplementary material for: Unleashing a novel function of Endonuclease G in mitochondrial genome instability
Source: eLife journal article supplement (doi:10.7554/elife.69916), 2022-11-17
Supplement: fig6-data1 [file Figure 6F_Quantitation_primer extension_wild type vs mutant plasmids.xlsx]

## Sheet: Sheet1
						Quantitation of primer extension assay for wild type vs mutant plasmid
							wild type		mutant
						No protein	104666	189832	110000	172489
						1	469135	1060559	336643	113735
						2	609422	1049524	364523	116782
						3	821176	1041694	313132	94218.5
