# Supplementary material for: Unleashing a novel function of Endonuclease G in mitochondrial genome instability
Source: eLife journal article supplement (doi:10.7554/elife.69916), 2022-11-17
Supplement: fig7-data1 [file Figure 7E_Quantitation to primer extension with EndoG vs EndoG mutant protein.xlsx]

## Sheet: Sheet1
							EndoG_WT_0.5 ul	EndoG_WT_1 ul	EndoG_M_0.5 ul	EndoG_M_1 ul
						Batch I	2542244	2353632	27961.5	206640
						Batch II	2733168	2259792	100000	501741
						Batch III	2368491	2744429	200000	1
