# Supplementary material for: Unleashing a novel function of Endonuclease G in mitochondrial genome instability
Source: eLife journal article supplement (doi:10.7554/elife.69916), 2022-11-17
Supplement: fig7-data1 [file Figure 7I_Quantitation to primer extension of extracts after depletion of EndoG and MGME1 from the extracts.xlsx]

## Sheet: Sheet1
						Quantitation to primer extension of extracts after depletion of EndoG and MGME1 from the extracts
						Beads control	EndoG IP	MGME1 IP
						5676458	4630281	551731
						4132216	3992462	668759
						3905299	5779735	221314
