# Supplementary material for: Unleashing a novel function of Endonuclease G in mitochondrial genome instability
Source: eLife journal article supplement (doi:10.7554/elife.69916), 2022-11-17
Supplement: fig7-data1 [file Figure 7K_Quantitation_primer extension_reconstitution_after IP.xlsx]

## Sheet: Sheet1
		Quantitation of primer extension for reconstitution of EndoG mediated cleavage after IP using purified Endo G
	Beads control	IP EndoG	Endo G
	5905299	568758	3904553
	4427616	651732	3779775
	3664586	239238	4992462
