# Supplementary material for: Unleashing a novel function of Endonuclease G in mitochondrial genome instability
Source: eLife journal article supplement (doi:10.7554/elife.69916), 2022-11-17
Supplement: fig7-data1 [file Figure7B_Quantitation of supercoiled DNA intensity wild type vs mutant.xlsx]

## Sheet: Sheet1
			wild type		mutant
		No protein	13653290	13500000	12653290	11500000
		30	13541220	13329000	12653290	11500000
		60	8424680	9424680	12653290	11500000
		90	5330072	6420075	10330070	10051000
		120	4487423	3787423	9330072	9420075
