# Supplementary material for: Unleashing a novel function of Endonuclease G in mitochondrial genome instability
Source: eLife journal article supplement (doi:10.7554/elife.69916), 2022-11-17
Supplement: fig8-data1 [file Figure 8B_Quantitation of localization of EndoG to mitochondria in different cell lines.xlsx]

## Sheet: Sheet1
		Quantitation of localization of Endonuclease to mitochondria in different cell line
	Control	HeLa	MEF	293T
	0.116	0.461	0.294	0.367
	0.201	0.424	0.408	0.421
	0.174	0.392	0.382	0.367
	0.151	0.483	0.328	0.272
	0.153	0.543	0.232	0.356
	0.184	0.449	0.354	0.471
	0.195	0.538	0.416	0.271
	0.16	0.444	0.318	0.318
	0.156	0.453	0.336	0.239
	0.202	0.559	0.489	0.495
	0.181	0.443	0.373	0.456
	0.112	0.414	0.433	0.332
	0.202	0.463	0.476	0.376
	0.198	0.421	0.318	0.422
	0.167	0.564	0.264	0.467
	0.177	0.558	0.419	0.497
	0.182	0.489	0.383	0.483
	0.158	0.503	0.369	0.512
	0.198	0.508	0.324	0.332
	0.123	0.522	0.286	0.421
	0.178	0.476	0.422	0.487
	0.203	0.408	0.476	0.431
	0.177	0.561	0.511	0.445
	0.187	0.608	0.431	0.378
	0.162	0.589	0.465	0.422
	0.158	0.522	0.498	0.359
	0.158	0.522	0.498	0.359
	0.146	0.438	0.378	0.295
	0.149	0.476	0.362	0.396
	0.134	0.387	0.457	0.461
	0.151	0.542	0.429	0.422
	0.133	0.497	0.477	0.432
	0.125	0.483	0.516	0.487
	0.157	0.462	0.421	0.441
	0.173	0.466	0.449	0.391
	0.113	0.436	0.426	0.348
	0.132	0.431	0.451	0.422
	0.158	0.444	0.487	0.359
	0.163	0.424	0.417	0.289
	0.188	0.572	0.447	0.455
	0.185	0.527	0.513	0.427
	0.179	0.467	0.544	0.512
	0.118	0.432	0.318	0.319
	0.161	0.443	0.472	0.361
	0.187	0.512	0.488	0.378
	0.116	0.518	0.444	0.421
	0.121	0.399	0.451	0.443
	0.111	0.542	0.492	0.465
	0.121	0.576	0.498	0.455
	0.113	0.531	0.452	0.541
	0.115	0.519	0.428	0.458
	0.177	0.391	0.461	0.432
	0.187	0.433	0.424	0.414
	0.162	0.422	0.392	0.463
	0.158	0.467	0.483	0.421
	0.158	0.497	0.543	0.564
	0.146	0.483	0.449	0.558
	0.149	0.512	0.538	0.489
	0.134	0.332	0.444	0.503
	0.151	0.421	0.453	0.508
	0.133	0.487	0.559	0.522
	0.125	0.431	0.443	0.476
	0.157	0.445	0.414	0.408
	0.173	0.378	0.463	0.561
	0.113	0.422	0.421	0.608
	0.132	0.359	0.564	0.589
	0.158	0.359	0.558	0.522
	0.163	0.295	0.489	0.522
	0.188	0.396	0.503	0.438
	0.185	0.461	0.508	0.328
	0.179	0.422	0.522	0.232
	0.118	0.432	0.476	0.354
	0.161	0.487	0.408	0.416
	0.187	0.441	0.561	0.318
	0.116	0.391	0.608	0.336
	0.121	0.348	0.589	0.489
	0.111	0.422	0.522	0.373
	0.121	0.359	0.522	0.433
	0.113	0.289	0.438	0.476
	0.115	0.455	0.476	0.318
	0.116	0.427	0.387	0.264
	0.201	0.461	0.359	0.419
	0.174	0.424	0.359	0.383
	0.151	0.392	0.295	0.369
	0.153	0.483	0.396	0.324
	0.184	0.543	0.461	0.286
	0.195	0.449	0.422	0.422
	0.16	0.538	0.432	0.476
	0.156	0.444	0.487	0.511
	0.202	0.453	0.441	0.431
	0.181	0.559	0.391	0.465
	0.112	0.443	0.348	0.498
	0.202	0.414	0.422	0.498
	0.198	0.463	0.359	0.378
	0.167	0.421	0.289	0.461
	0.177	0.564	0.455	0.424
	0.182	0.558	0.427	0.392
	0.158	0.489	0.512	0.483
	0.198	0.503	0.319	0.543
	0.123	0.508	0.361	0.449
	0.178	0.522	0.378	0.538
	0.203	0.476	0.421	0.444
		0.408	0.443	0.453
			0.465	0.559
			0.455
			0.541
			0.458
			0.432
