# Supplementary material for: Unleashing a novel function of Endonuclease G in mitochondrial genome instability
Source: eLife journal article supplement (doi:10.7554/elife.69916), 2022-11-17
Supplement: fig8-data1 [file Figure 8D_Quantitation_CoIF_TFAM vs EndoG.xlsx]

## Sheet: Sheet1
			Quantitation_CoIF_TFAM vs EndoG
	Sec. Control (Green)	Sec. Control (Red	Co IF
	0.02	0	0.32
		0.02	0.31
	0	0.04	0.45
	0.01	0.03	0.25
	0	0.01	0.33
	0.01	0.01	0.33
	0	0	0.33
	0	0	0.38
	0	0	0.35
	0	0	0.32
	0	0	0.45
	0	0	0.42
	0	0	0.44
	0.01	0	0.43
	0	0	0.44
	0	0	0.43
	0	0	0.38
	0	0	0.42
	0	0	0.33
	0	0	0.32
	0	0	0.38
	0	0	0.31
	0	0	0.322
	0	0	0.365
	0	0	0.31
	0.01	0	0.41
	0	0	0.31
	0	0	0.23
	0	0	0.31
	0	0	0.22
	0	0	0.36
	0	0	0.31
	0	0	0.24
	0	0	0.234
	0	0	0.29
	0	0	0.22
	0	0	0.21
	0	0	0.32
	0	0	0.32
	0	0	0.33
	0	0	0.28
	0	0	0.25
	0	0	0.22
	0	0	0.26
	0	0	0.31
	0	0	0.31
	0	0	0.42
	0.01	0	0.23
	0	0	0.23
	0	0	0.26
	0.01	0.01	0.29
	0.01	0	0.37
	0	0	0.32
	0	0	0.31
	0	0	0.27
	0	0	0.25
	0	0	0.23
	0	0	0.31
	0	0	0.22
	0	0	0.36
	0	0	0.31
	0	0	0.24
	0	0	0.234
	0	0	0.29
	0	0	0.22
	0	0	0.21
	0	0	0.32
	0	0	0.32
	0	0	0.33
	0	0	0.28
	0	0	0.25
	0	0	0.22
	0	0	0.26
	0	0	0.31
	0	0	0.31
	0	0	0.42
	0	0	0.23
	0	0	0.23
	0	0	0.26
	0	0	0.29
	0	0	0.37
	0	0	0.32
	0	0	0.31
	0	0	0.27
	0	0	0.31
	0	0	0.45
	0	0	0.25
	0	0	0.33
	0	0	0.33
	0	0	0.33
	0	0	0.38
	0	0	0.35
	0	0	0.32
	0	0	0.45
	0	0	0.42
	0	0	0.44
	0		0.43
	0		0.44
	0		0.43
			0.38
			0.42
