# Supplementary material for: Unleashing a novel function of Endonuclease G in mitochondrial genome instability
Source: eLife journal article supplement (doi:10.7554/elife.69916), 2022-11-17
Supplement: fig8-data1 [file Figure 8G_quantitation_shRNA mediated cleavage_primer extension .xlsx]

## Sheet: Sheet1
		Quantitation of shRNA mediated cleavage using primer extension
	scrambled	shRNA
	3664586	1328858
	4427616	239238
	7905299	768758
	1904553	94288.5
	2779775	29426.4
	2992462	757870
	850670	651732
