# Supplementary material for: Unleashing a novel function of Endonuclease G in mitochondrial genome instability
Source: eLife journal article supplement (doi:10.7554/elife.69916), 2022-11-17
Supplement: fig9-data1 [file Figure 9B_Quantitation of colocalization BG4 and EndoG .xlsx]

## Sheet: Sheet1
					Quantitation of colocalization BG4 and EndoG
					Control	Red	Green
					0.061	0.32	0.27
					0.083	0.31	0.22
					0.017	0.25	0.258
					0.044	0.25	0.22
					0.015	0.23	0.281
					0.011	0.23	0.23
					0.07	0.23	0.246
					0.01	0.38	0.221
					0.022	0.35	0.21
					0.017	0.32	0.261
					0.021	0.45	0.24
					0.035	0.42	0.23
					0.022	0.44	0.25
					0.012	0.43	0.28
					0.011	0.44	0.25
					0.034	0.43	0.22
					0.015	0.38	0.25
					0.114	0.42	0.22
					0.117	0.33	0.24
					0.111	0.32	0.23
					0.012	0.28	0.24
					0.026	0.21	0.23
					0.019	0.222	0.28
					0.023	0.265	0.22
					0.011	0.31	0.26
					0.012	0.21	0.256
					0.012	0.21	0.231
					0.017	0.23	0.25
					0.014	0.31	0.218
					0.015	0.22	0.21
					0.014	0.36	0.238
					0.017	0.31	0.28
					0.031	0.24	0.24
					0.011	0.234	0.25
					0.017	0.29	0.252
					0.014	0.22	0.2
					0.015	0.21	0.223
					0.024	0.32	0.25
					0.017	0.32	0.25
					0.051	0.33	0.22
					0.012	0.28	0.25
					0.017	0.25	0.252
					0.022	0.22	0.24
					0.015	0.26	0.223
					0.012	0.31	0.25
					0.015	0.21	0.25
					0.016	0.22	0.22
					0.014	0.23	0.37
					0.015	0.23	0.25
					0.013	0.26	0.268
					0.017	0.29	0.32
					0.011	0.37	0.291
					0.012	0.32	0.43
					0.006	0.31	0.25
					0.008	0.27	0.221
					0.013	0.25	0.21
					0.011	0.35	0.261
					0.014	0.32	0.24
					0.012	0.45	0.23
					0.017	0.42	0.25
					0.024	0.44	0.28
					0.015	0.43	0.25
					0.014	0.44	0.22
					0.017	0.43	0.25
					0.01	0.38	0.22
					0.011	0.42	0.24
					0.017	0.33	0.23
					0.014	0.32	0.24
					0.015	0.28	0.23
					0.014	0.21	0.28
					0.017	0.32	0.22
					0.011	0.32	0.26
					0.012	0.33	0.256
					0.017	0.28	0.231
					0.02	0.25	0.25
					0.015	0.22	0.218
					0.012	0.26	0.21
					0.012	0.31	0.238
					0.017	0.21	0.28
					0.014	0.22	0.24
					0.015	0.23	0.25
					0.014	0.23	0.252
					0.017	0.26	0.2
					0.011	0.29	0.223
					0.012	0.37	0.25
					0.006	0.32	0.25
					0.009	0.31	0.22
					0.013	0.27	0.25
					0.011	0.234	0.252
					0.012	0.29	0.24
					0.012	0.22	0.223
					0.017	0.21	0.25
					0.014	0.32	0.25
					0.015	0.32	0.22
					0.014	0.33	0.356
					0.017	0.28	0.281
						0.25	0.253
						0.22	0.278
						0.26	0.31
						0.31	0.38
						0.21
						0.22
