# Supplementary material for: Unleashing a novel function of Endonuclease G in mitochondrial genome instability
Source: eLife journal article supplement (doi:10.7554/elife.69916), 2022-11-17
Supplement: fig9-data1 [file Figure 9E_m-ChIP using mitoextract plus mitoDNA_EndoG_threshold cycles.xlsx]

## Sheet: Sheet1
					m-ChIP using mitoextract plus mitoDNA_EndoG threshold cycles
		Input
		VKK11-VKK12	RBK46-VKK14	SD10-SD11	SD12-SD13	SD14-SD 15	RBK41- RBK17	RBK15- RBK16	RBK17- RBK18	RBK19-RBK20	RBK21-RBK22	RBK23-RBK24	SD2-SD3	SD4-SD5	SD6-SD7	SD8-SD9
		10.86	10.69	9.43	10.41	10.56	9.01	13.54	11.71	13.7	10.76	6.86	10.89	10.98	11.57	11.68
		9.75	10.73	10.08	11.09	9.55	9.72	11.25	11.48	13.22	10.53	9.43	10.42	8.23	10.95	15.32
		9.37	9.93	10.35	10.52	10.05	9.08	10.77	11.1	10.98	11.83	10.6	10.25	9.45	11.44	14.81
		8.98	11.08	10.94	8.84	15.31	9.35	10.02	10.07	12.49	9.42	9.72	10.23	10.05	10.69	15.55
		control
		VKK11-VKK12	RBK46-VKK14	SD10-SD11	SD12-SD13	SD14-SD 15	RBK41- RBK17	RBK15- RBK16	RBK17- RBK18	RBK19-RBK20	RBK21-RBK22	RBK23-RBK24	SD2-SD3	SD4-SD5	SD6-SD7	SD8-SD9
		25.43	28.81	35.74	29.4	28.17	29.5	26.29	26.74	28.43	28.3	24.44	28.06	28.28	26.7	26.91
		25.6	26.18	34.41	29.31	27.16	30.21	28.3	28.43	29.01	27.97	25.22	28.66	28.74	26.86	26.62
		25.73	28.86		30.7	28.17	31.07	27.11	28.05	28.55	28.16	24.09	28.36	28.01	27.64	27.45
		26.37	27.56				26.09	26.25	29.64	30.44	29.26	24.13	29.21	26.29	25.24	26.16
		Endo G pull down
		VKK11-VKK12	RBK46-VKK14	SD10-SD11	SD12-SD13	SD14-SD 15	RBK41- RBK17	RBK15- RBK16	RBK17- RBK18	RBK19-RBK20	RBK21-RBK22	RBK23-RBK24	SD2-SD3	SD4-SD5	SD6-SD7	SD8-SD9
		10.92	11.26	17.16	12.34	9.96	26.61	31.74	30.71	27.37	27.79	24.35	25.4	28.37	29.29	24.8
		13.92	11.59	16.27	13.11	11.54	28.72	22.15	22.28	32.35	29.78	23.66	26.48	25.2	28.92	26.36
		15.07	9.09	18.23	12.02	10.04	28.74	23.99	22.24	26.58		23.15	26.35	25.47	28.2	27.09
		13.51	9.38	19.21			31.16	25.16	22.12	31.14			29.49	28.43	27.66	28.53
