# Supplementary material for: Unleashing a novel function of Endonuclease G in mitochondrial genome instability
Source: eLife journal article supplement (doi:10.7554/elife.69916), 2022-11-17
Supplement: fig9-data1 [file Figure 9F_mitoChIP using EndoG_threshold cycles.xlsx]

## Sheet: Sheet1
						mitoChIP using EndoG_threshold cycles
	Input
	VKK11-VKK12	RBK46-VKK14	SD10-SD11	SD12-SD13	SD14-SD 15	RBK41- RBK17	RBK15- RBK16	RBK17- RBK18	RBK19-RBK20	RBK21-RBK22	RBK23-RBK24	SD2-SD3	SD4-SD5	SD6-SD7	SD8-SD9
	8.19	12.61	19.88	10.07	13.36	7.17	7.28	14.73	6.45	13.22	10.63	12.7	9.57	9.69	9.16
	7.88	13.08	17.46	12.71	12.15	7.1	6.55	14.7	9.56	10.98	6.4	10.79	9.36	9.31	11.17
	8.11	10.37	19.84	10.23	14.66	6.77	6.77	15.38	12.2	12.49	4.94	11.1	9.38	9.59	9.05
	10.6	11.65	18.33	7.32	13.75	10.73	10.21	11.89	10.2	10.72	9.46	9.64	14.3	11.38	9.95
	9.66	12.33	17.62	6.44	12.25	10.58	10.09	10.03	9.34		9.66	9.07	14.24	11.65	10.63
	10.01	10.33	19.22			11.72	10.24	11.07	9.5		11.07	8.7	14.76	11.24	10.21
	control
	VKK11-VKK12	RBK46-VKK14	SD10-SD11	SD12-SD13	SD14-SD 15	RBK41- RBK17	RBK15- RBK16	RBK17- RBK18	RBK19-RBK20	RBK21-RBK22	RBK23-RBK24	SD2-SD3	SD4-SD5	SD6-SD7	SD8-SD9
	30.01	28.29	35.33	35.76	28.47	25.71	25.12	31.11	30.67	18.29	33.38	15.57	17.82	16.28	18.32
	29.2	27.63	35.89	33.11	28.78	26.03	25.52	31.92	30.12	29.21	33.79	16.15	17.77	16.22	18.09
	29.1	26.93	32.44	31.18	29.2	25.79	26.49	32.01	30.95	29.72	34.41	16.11	18.29	16.44	18.17
	30							31.81	32.88		29.29	23.95	29.21	29.39	27.43
	31.11							31.5	33.22		29.2	23.43	29.72	29.83	26.61
											29.69	23.35	29.6	29.66	26.86
	Endo G pull down
	VKK11-VKK12	RBK46-VKK14	SD10-SD11	SD12-SD13	SD14-SD 15	RBK41- RBK17	RBK15- RBK16	RBK17- RBK18	RBK19-RBK20	RBK21-RBK22	RBK23-RBK24	SD2-SD3	SD4-SD5	SD6-SD7	SD8-SD9
	5.64	11.91	18.32	10.74	9.9	28.88	25.29	31.17	31.8	33.79	32.06	21.17	22.08	21.32	21.21
	6.33	9.54	18.9	7.24	12.52	28.62	25.5	31.17	33.14	34.41	33.84	21.14	22.09	21.24	22.28
	10.13	10.12	18.33	5.18	10.56	34.02	25.85	32.48	33.13	29.29	33.05	21.42	26.27	21.21	24.09
	10.38	13.83	18.56	11.26	16.79	29.2	27.05	31.52	32.22		28.68	24.08	30.59	29.02	27.31
	10	13.73		10.05	16.51	28.95	26.58	31.91	32.87		29.33	23.14	31.33	29.35	26.5
		13.14		9.81	16.41	29.23	26.46	31.4	34.32		29.69	23.09	30.59	29.65
