# Supplementary material for: Unleashing a novel function of Endonuclease G in mitochondrial genome instability
Source: eLife journal article supplement (doi:10.7554/elife.69916), 2022-11-17
Supplement: fig10-data1 [file Figure 10B_Quantitation of subfractionation_TFAM_cytochrome C and Endonuclease G_expression.xlsx]

## Sheet: Sheet1
		Quantitation of subfractionation_TFAM_cytochrome C and Endonuclease G_expression
	TFAM
		Total						Supernatant				Pellet
	Control	30814010	35806530	49375660				35623020	33506850	36345000		458141	415322	562316
	Treated	33156930	35343850	39457840				31965700	35673220	31235670		344523	541187	432211
	Cytochrome C
		Total						Supernatant				Pellet
	Control	44031780	33651620	31211450				764788	459234	832886		26450110	25043150	29760950
	Treated	23156930	25343850	30010200				156933	343853	3438531		21532200	23237950	26311230
	Endonuclease G
		Total						Supernatant				Pellet
	Control	44288580	37966490	35913930				16043150	13917330	17438500		47658380	30010200	45760950
	Treated	33156930	33534380	35343850				32735490	48323890	37443740		36917330	31807650	34871220
